# Supplementary material for: “Clinical characteristics, symptoms, management and health outcomes in 8,598 pregnant women diagnosed with COVID-19 compared to 27,510 with seasonal influenza in France, Spain and the US: a network cohort analysis”
Source: bioRxiv or medRxiv preprint supplement (doi:10.1101/2020.10.13.20211821), 2020-10-14

## SUPPLEMENTARY MATERIALS

**Supplementary Table 1. Description of databases included in the study**

| <b>Country</b> | <b>Name</b>                                              | <b>Description</b>                                                                                                                                                                                                                                                                                                                                                                                                                     |
|----------------|----------------------------------------------------------|----------------------------------------------------------------------------------------------------------------------------------------------------------------------------------------------------------------------------------------------------------------------------------------------------------------------------------------------------------------------------------------------------------------------------------------|
| US             | HealthVerity                                             | This HealthVerity derived data set contains de-identified patient information with an antibody and/or diagnostic test for COVID-19 linked to all available Medical Claims and Pharmacy Data from select private data providers participating in the HealthVerity marketplace.                                                                                                                                                          |
| US             | Optum EHR                                                | Optum's Electronic Health Record data, a medical records database for patients receiving a COVID-19 diagnosis record or lab test for SARS-CoV-2.                                                                                                                                                                                                                                                                                       |
| Spain          | Information System for Research in Primary Care (SIDIAP) | The Information System for Research in Primary Care (SIDIAP; <a href="http://www.sidiap.org">www.sidiap.org</a> ) is a primary care records database that covers approximately 7 million people, equivalent to an 80% of the population of Catalonia, North-East Spain. Healthcare is universal and tax-payer funded in the region, and primary care physicians are gatekeepers for all care and responsible for repeat prescriptions. |
| France         | LPD                                                      | Computerised network of physicians including GPs who contribute to a centralised database of anonymised patient EMR. Currently, >1200 GPs from 400 practices are contributing to the database covering 7.8M patients in France.                                                                                                                                                                                                        |
| US             | IQVIA Open Claims                                        | Pre-adjudicated claims covering over 300 Million lives (~80% of the US) collected from office-based physicians and specialists via office management software and clearinghouse switch sources for the purpose of reimbursement.                                                                                                                                                                                                       |
| US             | Columbia University Irving Medical Center                | The clinical data warehouse of NewYork-Presbyterian Hospital/Columbia University Irving Medical Center, New York, NY, based on its current and previous electronic health record systems, with data spanning over 30 years and including over 6 million patients                                                                                                                                                                       |

**Supplementary Table 2. Definitions and codes used to identify persons with a COVID-19 diagnosis record or a SARS-CoV-2 positive test with at least 365d prior observation**

The below tables summarize the concepts used to identify patients tested for SARS-CoV-2 and patients tested positive for SARS-CoV2. The full description of the logic used is provided at <https://atlas.ohdsi.org/#/cohortdefinition/200> for *diagnosed* and <https://atlas.ohdsi.org/#/cohortdefinition/197> for *hospitalized* cohorts.

**COVID-19 conditions**

| <b>Id</b> | <b>Name</b>                           | <b>Vocabulary</b> |
|-----------|---------------------------------------|-------------------|
| 439676    | Coronavirus infection                 | SNOMED            |
| 4100065   | Disease due to Coronaviridae          | SNOMED            |
| 37311060  | Suspected disease caused by 2019-nCoV | SNOMED            |
| 37311061  | Disease caused by 2019-nCoV           | SNOMED            |

**COVID-19 specific test positive**

| <b>Id</b> | <b>Name</b>                                                                 | <b>Vocabulary</b> |
|-----------|-----------------------------------------------------------------------------|-------------------|
| 37310282  | 2019 novel coronavirus detected                                             | SNOMED            |
| 37310281  | 2019 novel coronavirus not detected*                                        | SNOMED            |
| 756055    | Measurement of Severe acute respiratory syndrome coronavirus 2 (SARS-CoV-2) | OMOP<br>Extension |

\*used to only include measurements have a value equal detected, positive or present

**Supplementary Figure 1a. COVID-19 symptoms at index date amongst pregnant women diagnosed versus hospitalized with COVID-19 across all databases**

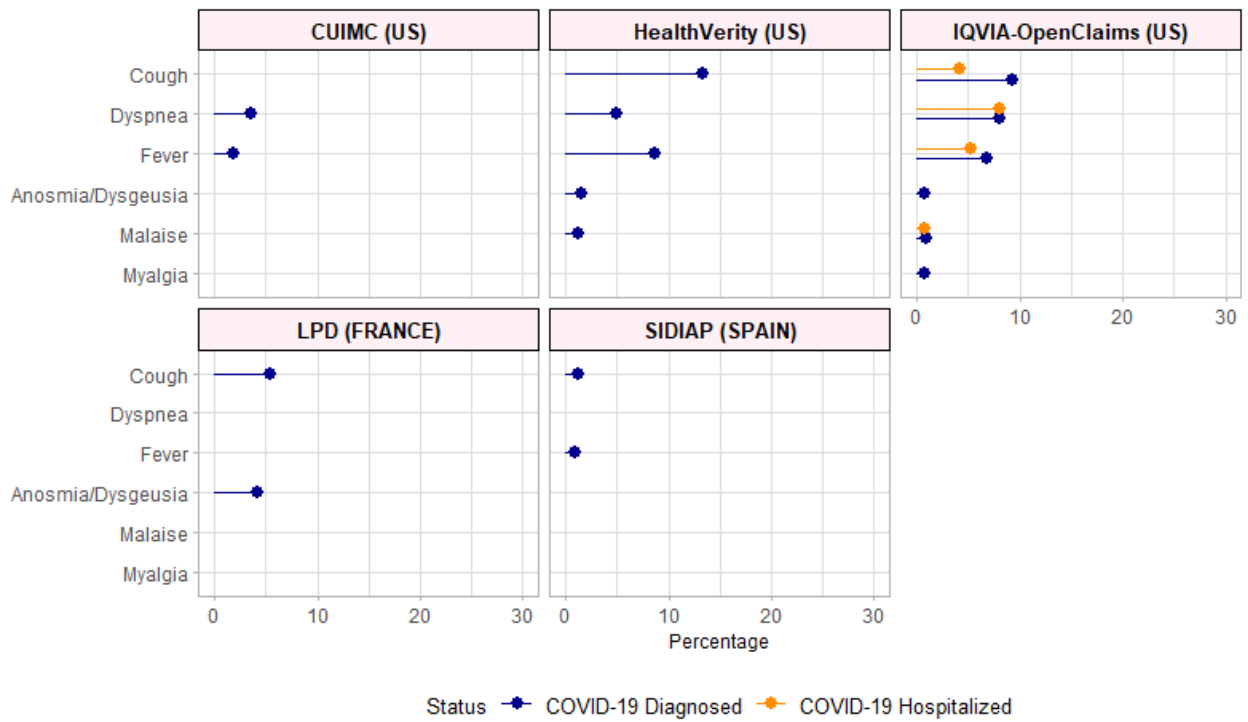

**Supplementary Figure 1b. COVID-19 symptoms at index date amongst pregnant women diagnosed with COVID-19 versus diagnosed with seasonal influenza across all databases**

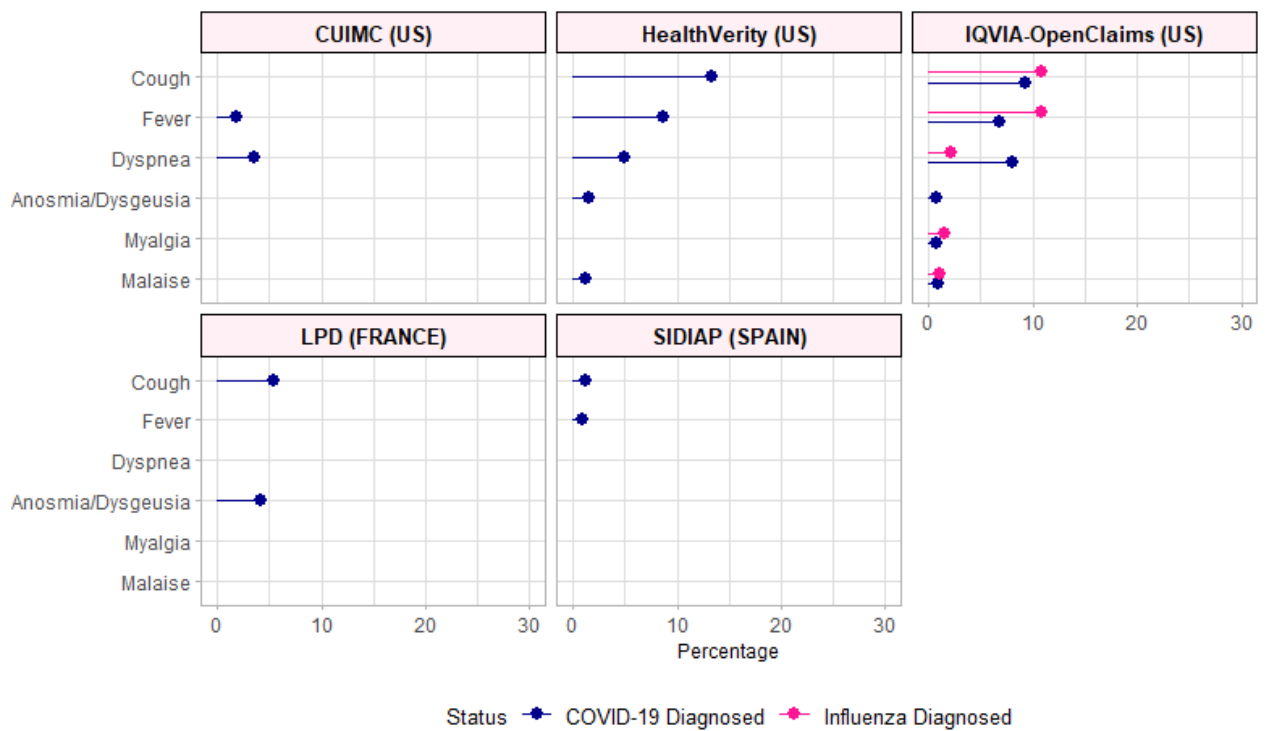

**Supplementary Figure 2a. Maternal complications and pregnancy-related outcomes amongst women diagnosed versus hospitalized with COVID-19 across all databases**

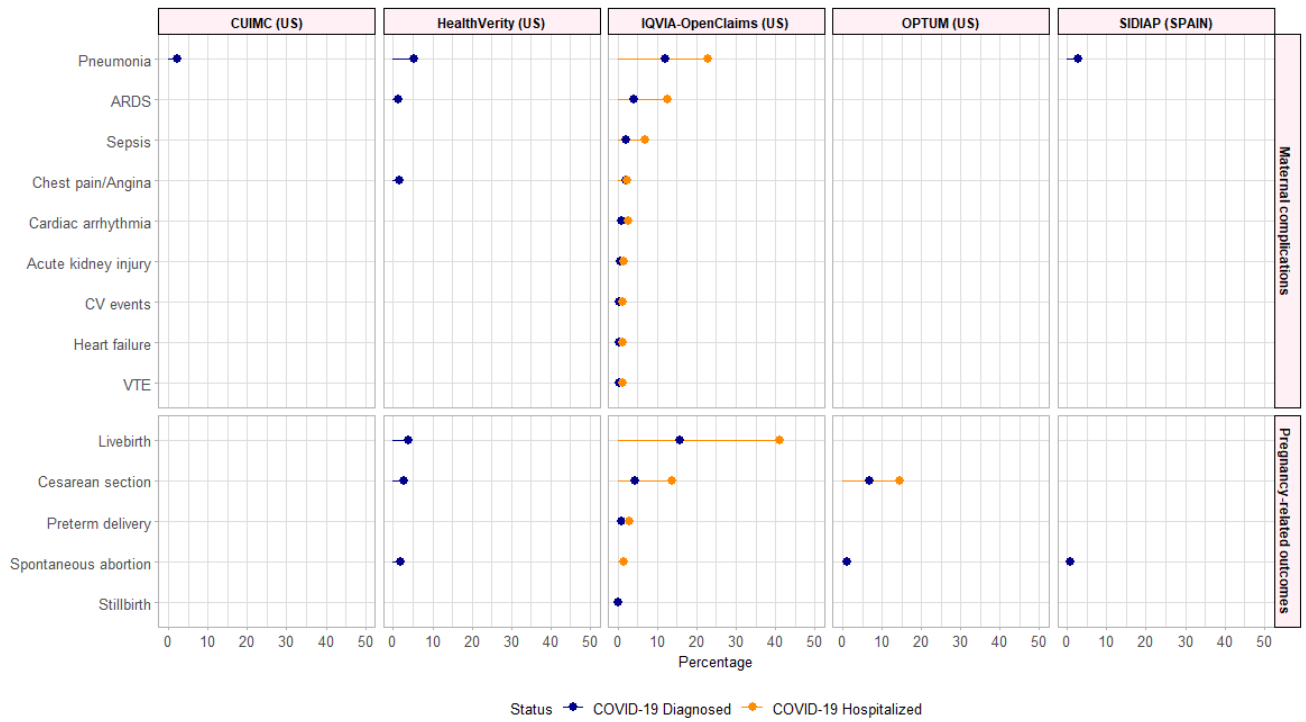

**Supplementary Figure 2b. Maternal complications and pregnancy-related outcomes amongst women diagnosed with COVID19 versus diagnosed with influenza across all databases**

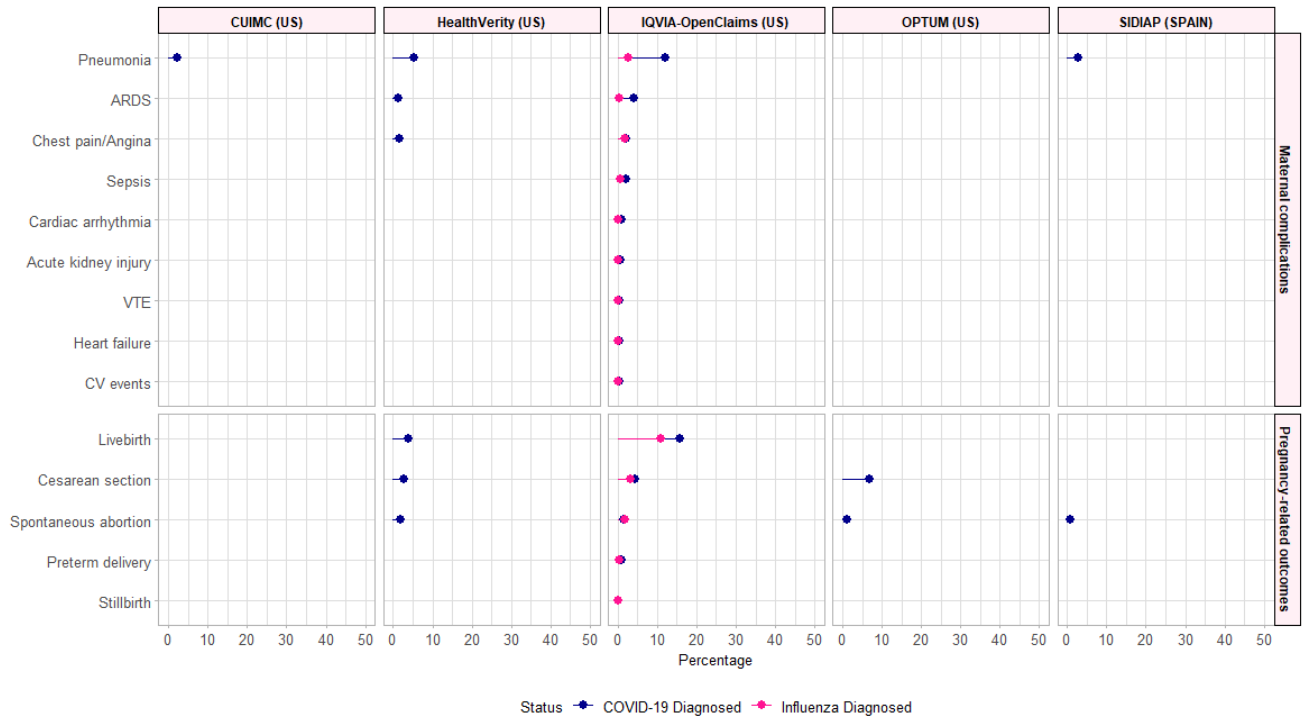

Supplement: Supplementary file [file media-1.pdf]
